# Supplementary material for: Is in situ simulation in emergency medicine safe? A scoping review
Source: HighWire-hosted journal article supplement (doi:10.1136/bmjopen-2021-059442), 2022-07-01

## eAppendix

### eAppendix 1. Search strategy and keywords

AND (((("Simulation Training"[Mesh] OR "Manikins"[Mesh])) OR ((Patient Simulation\*[Title/Abstract] OR Simulation Training[Title/Abstract] OR Manikin\*[Title/Abstract] OR Mannequin\*[Title/Abstract] OR Interactive Learning[Title/Abstract])))

and topic emergency medicine (((("Emergency Service, Hospital"[Mesh] OR "Emergency Medicine"[Mesh] OR "Emergency Medical Services"[Mesh] OR ((Hospital Emergency Service\*[Title/Abstract] OR Emergency Department\*[Title/Abstract] OR Emergency Unit\*[Title/Abstract] OR Emergency Ward\*[Title/Abstract] OR Emergency Room\*[Title/Abstract] OR Trauma Center\*[Title/Abstract] OR Trauma Centre\*[Title/Abstract] OR Emergency Medicine[Title/Abstract] OR Emergency Medical Service\*[Title/Abstract] OR Prehospital Emergency Care[Title/Abstract])))

for the intervention.

| <b>Concept 1:</b>                                                                                                |                                                       |                                                      |
|------------------------------------------------------------------------------------------------------------------|-------------------------------------------------------|------------------------------------------------------|
| <b>Free text</b>                                                                                                 | <b>PubMed and Embase thesaurus</b>                    |                                                      |
|                                                                                                                  | <b>MeSH</b>                                           | <b>EmTree</b>                                        |
| Patient Simulation*<br>Simulation Training<br>Manikin*<br>Mannequin*<br>Interactive Learning<br>Crash test dumm* | Patient Simulation<br>Simulation Training<br>Manikins | Patient Simulation<br>Simulation training<br>Manikin |

| <b>Concept 2:</b>                                                                                                                                                                                                                   |                                                                                                   |                                                        |
|-------------------------------------------------------------------------------------------------------------------------------------------------------------------------------------------------------------------------------------|---------------------------------------------------------------------------------------------------|--------------------------------------------------------|
| <b>Free text</b>                                                                                                                                                                                                                    | <b>PubMed and Embase thesaurus</b>                                                                |                                                        |
|                                                                                                                                                                                                                                     | <b>MeSH</b>                                                                                       | <b>EmTree</b>                                          |
| Hospital Emergency Service*<br>Emergency Department*<br>Emergency Unit*<br>Emergency Ward*<br>Emergency Room*<br>Trauma Center*<br>Trauma Centre*<br>Emergency Medicine<br>Emergency Medical Service*<br>Prehospital Emergency Care | Emergency Service, Hospital<br>Emergency medicine<br>Trauma Centers<br>Emergency medical services | Hospital emergency service<br>Emergency health service |

## eAppendix 2. PRISMA Flow diagram

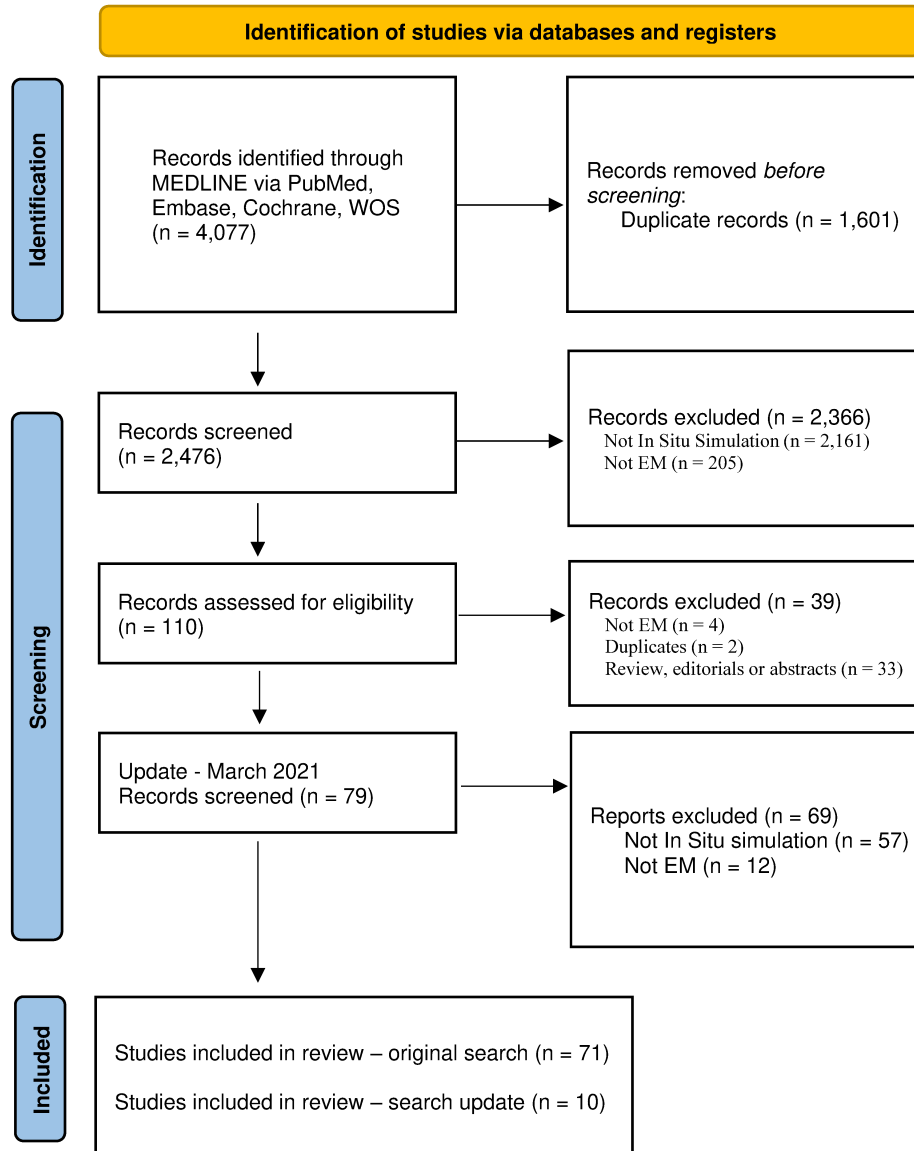

Supplement: bmjopen-2021-059442supp001_data_supplement.pdf [file bmjopen-2021-059442supp001_data_supplement.pdf]
